# Supplementary material for: Stable and large-scale organic–inorganic halide perovskite nanocrystal/polymer nanofiber films preparedviaa greenin situfiber spinning chemistry method
Source: Royal Society of Chemistry journal article supplement (doi:10.1039/d2nr01691e), 2022-01-01
Supplement: d2nr01691e1.pdf [file d2nr01691e1.pdf]

## Supporting information

### **A Stable and Large-Scale Organic-Inorganic Halide Perovskite Nanocrystals/Polymer Nanofiber Films Prepared by a Green and In-Situ Fiber Spinning Chemistry**

Jing-Jing Li,<sup>1,a</sup> Tingting Cui,<sup>1,a</sup> Jiafei Yu,<sup>b</sup> Zhi-Bin Liang,<sup>a</sup> Yunzheng Liang,<sup>a</sup> Jun Li,<sup>\*,b</sup> and Su Chen<sup>\*,a</sup>

<sup>a</sup> State Key Laboratory of Materials-Oriented Chemical Engineering, College of Chemical Engineering, Jiangsu Key Laboratory of Fine Chemicals and Functional Polymer Materials, Nanjing Tech University, No. 5 Xin Mofan Road, Nanjing 210009, P. R. China. E-mail: chensu@njtech.edu.cn

<sup>b</sup> Department of General Surgery, The Affiliated Jiangning Hospital of Nanjing Medical University, Nanjing, China. E-mail: lijun@njmu.edu.cn

## Supplementary Figures

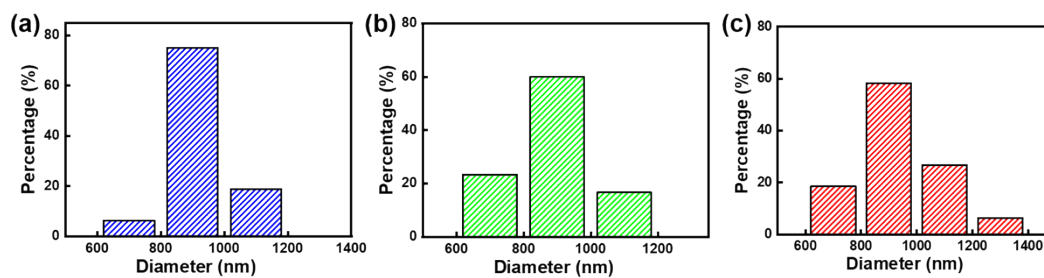

**Figure S1.** The corresponding size distributions of (a) PAN/MAPb(Br<sub>x</sub>Cl<sub>1-x</sub>)<sub>3</sub>, (b) PAN/MAPbBr<sub>3</sub> and (c) PAN/MAPb(Br<sub>x</sub>I<sub>1-x</sub>)<sub>3</sub> nanofibers.

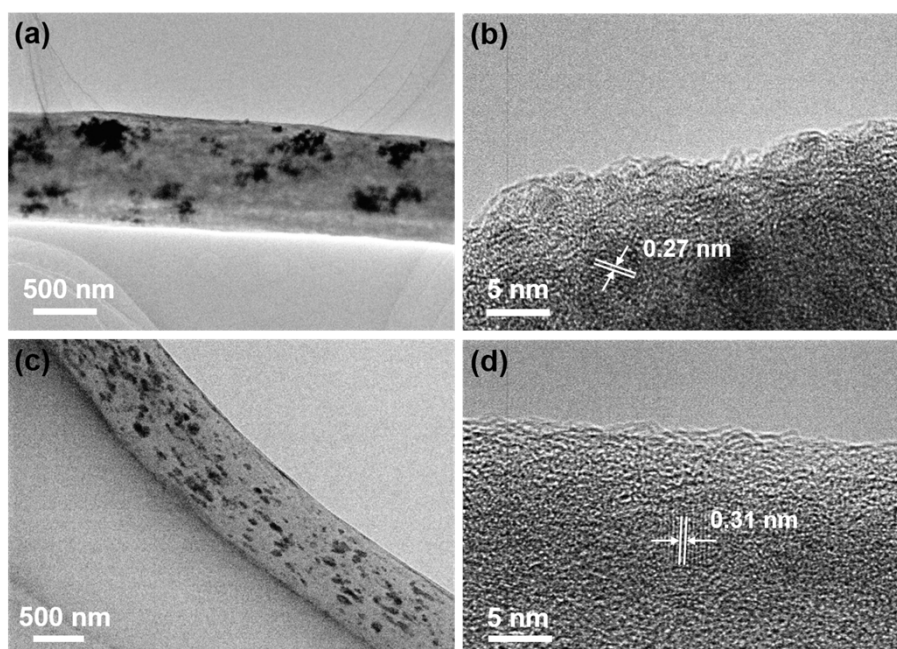

**Figure S2.** (a) TEM and (b) HRTEM images of PAN/MAPb(Br<sub>x</sub>Cl<sub>1-x</sub>)<sub>3</sub> nanofiber. (c) TEM and (d) HRTEM images of PAN/MAPb(Br<sub>x</sub>I<sub>1-x</sub>)<sub>3</sub> nanofiber.

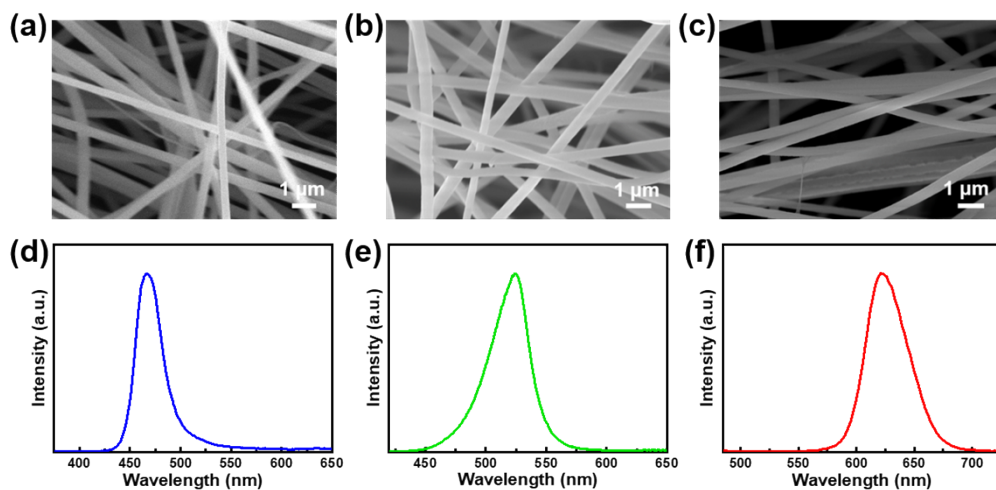

**Figure S3.** SEM images of (a) PMMA/MAPb(Br<sub>x</sub>Cl<sub>1-x</sub>)<sub>3</sub>, (b) PMMA/MAPbBr<sub>3</sub> and (c) PMMA/MAPb(Br<sub>x</sub>I<sub>1-x</sub>)<sub>3</sub> nanofiber films. PL emission spectra of (d) PMMA/MAPb(Br<sub>x</sub>Cl<sub>1-x</sub>)<sub>3</sub>, (e) PMMA/MAPbBr<sub>3</sub> and (f) PMMA/MAPb(Br<sub>x</sub>I<sub>1-x</sub>)<sub>3</sub> nanofiber films.

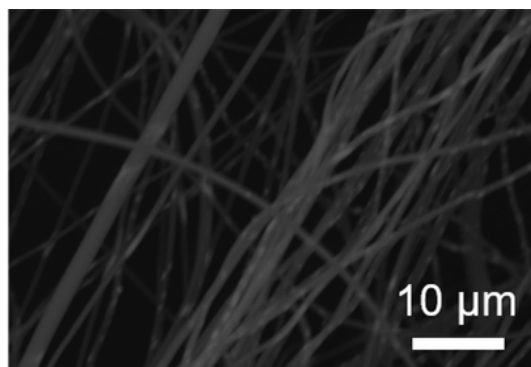

**Figure S4.** Original SEM image of PAN/MAPbBr<sub>3</sub> nanofiber film for collecting EDS mapping shown in Fig. 2g.

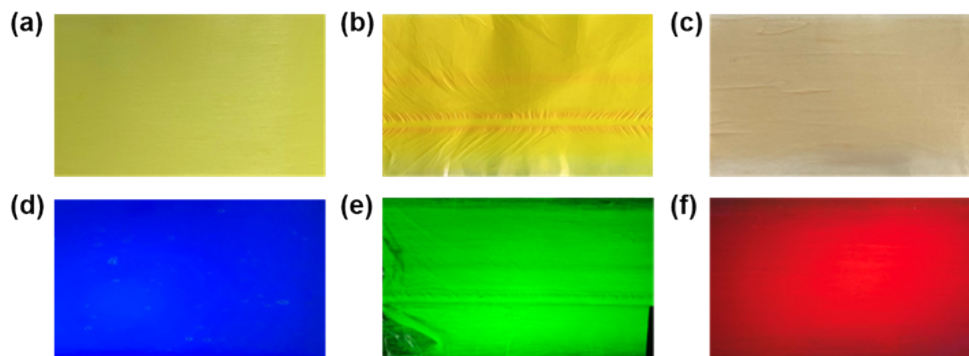

**Figure S5.** Photographs of (a) PAN/MAPb(Br<sub>x</sub>Cl<sub>1-x</sub>)<sub>3</sub>, (b) PAN/MAPbBr<sub>3</sub> and (c) PAN/MAPb(Br<sub>x</sub>I<sub>1-x</sub>)<sub>3</sub> nanofiber films and their corresponding digital photos under 365 nm UV light (d-f).

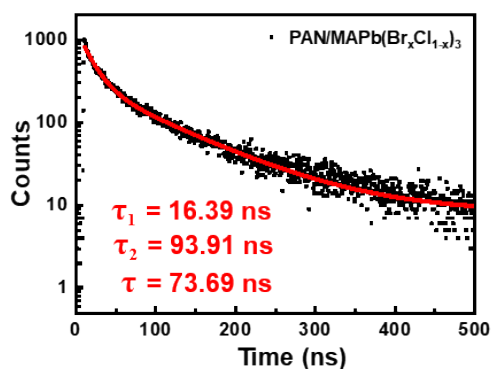

**Figure S6.** Time-resolved fluorescence decay curves of PAN/MAPb(Br<sub>x</sub>Cl<sub>1-x</sub>)<sub>3</sub> nanofiber film.

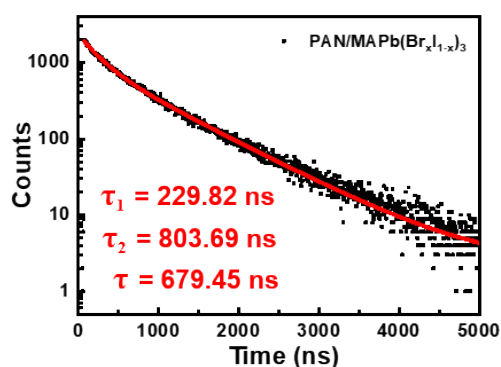

**Figure S7.** Time-resolved fluorescence decay curves of PAN/MAPb(Br<sub>x</sub>I<sub>1-x</sub>)<sub>3</sub> nanofiber film.

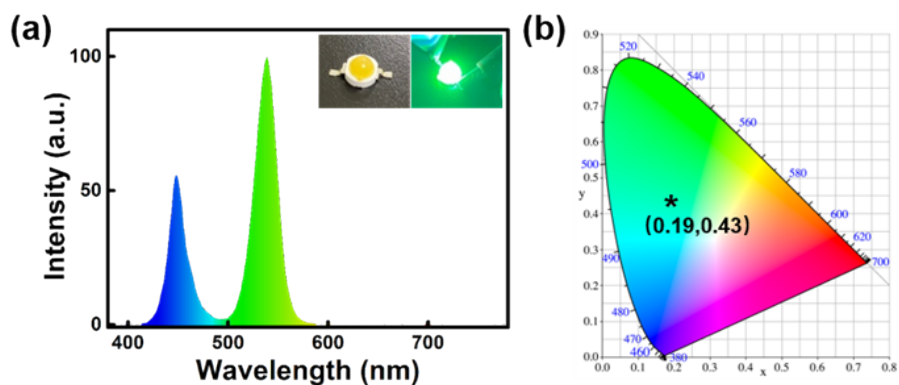

**Figure S8.** (a) Emission spectra of the green LED prepared by PAN/MAPbBr<sub>3</sub> nanofiber film. Inset: The photographs of the prepared green LED (the left one) and the LED driven by a voltage of 3.0 V (the right one). (b) CIE color coordinates corresponding to the PAN/MAPbBr<sub>3</sub> nanofiber film.

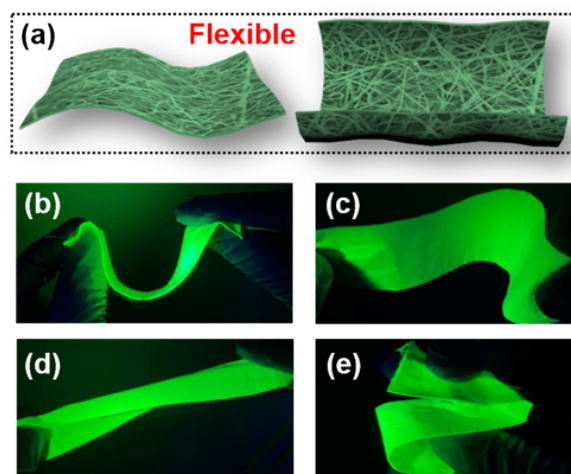

**Figure S9.** (a) Flexibility of PAN/MAPbBr<sub>3</sub> nanofiber film. (b-e) Photographs of the bending and folding shapes of PAN/MAPbBr<sub>3</sub> nanofiber film under 365 nm UV light.

**Table S1.** Preparation conditions and optical characteristics of PAN/MAPbX<sub>3</sub> (X = Cl, Br, I) nanofiber films.

| Samples                                                   | MAX: PbBr <sub>2</sub><br>[molar ratio] | PL Peak<br>position<br>[nm] | PLQY<br>[%] | $\tau$ [ns] | Fitting<br>values [ns]                                    | FWHM<br>[nm] |
|-----------------------------------------------------------|-----------------------------------------|-----------------------------|-------------|-------------|-----------------------------------------------------------|--------------|
| PAN/MAPbBr <sub>3</sub>                                   | 0.5 : 1                                 | 526                         | 11          | 24.53       | $\tau_1 = 0.68$<br>$\tau_2 = 8.87$<br>$\tau_3 = 37.75$    | 23           |
|                                                           | 1 : 1                                   | 532                         | 18          | 96.24       | $\tau_1 = 20.58$<br>$\tau_2 = 151.86$                     | 24           |
|                                                           | 2 : 1                                   | 528                         | 58          | 177.65      | $\tau_1 = 34.48$<br>$\tau_2 = 262.64$                     | 27           |
|                                                           | 3 : 1                                   | 534                         | 36          | 214.36      | $\tau_1 = 40.21$<br>$\tau_2 = 296.64$                     | 25           |
|                                                           | 4 : 1                                   | 533                         | 28          | 168.47      | $\tau_1 = 20.23$<br>$\tau_2 = 87.62$<br>$\tau_3 = 322.56$ | 25           |
| PAN/MAPb(Br <sub>x</sub> I <sub>1-x</sub> ) <sub>3</sub>  | 4 : 1                                   | 612                         | 16          | 679.45      | $\tau_1 = 229.82$<br>$\tau_2 = 803.69$                    | 70           |
| PAN/MAPb(Br <sub>x</sub> Cl <sub>1-x</sub> ) <sub>3</sub> | 2 : 1                                   | 464                         | 25          | 73.69       | $\tau_1 = 16.39$<br>$\tau_2 = 93.91$                      | 29           |
